# Supplementary material for: Overexpression of BmJHBPd2 Repressed Silk Synthesis by Inhibiting the JH/Kr-h1 Signaling Pathway in Bombyx mori
Source: MDPI journal article supplement (doi:10.3390/ijms241612650), 2023-08-10
Supplement: s1 [file s1]

## Supplementary Materials

**Table S1.** Primer sets used in the transgenic overexpression.

**Table S2.** Primer sequences used in this study.

**Figure S1.** Main characteristics of different silk-producing strains of *Dazao* and *S872*.

**Figure S2.** Overexpression of *BmJHBPd2* results in inhibition of JH catabolic enzyme in silk glands.

**Table S1.** Primer sets used in the transgenic overexpression.

| Gene                                      | Primer sequences (5'-3')                                                |
|-------------------------------------------|-------------------------------------------------------------------------|
| <i>BmJHBPd2</i> -F<br>( <i>Bam</i> H I)   | <u>GGATCC</u> ATGTGGACCGTCTGTTTTAGT                                     |
| <i>BmJHBPd2</i> -R<br>( <i>Not</i> I-Myc) | <u>GCGGCCGCTTACAGATCCTCTTCTGAGATGAGTTTTGTTCTTCGGGCATTAAT</u><br>TCGTCAA |

The underlined sequence is *Bam*H I restriction site, *Not* I restriction site and Myc tag sequence.

**Table S2.** Primer sequences used in this study.

| Assay   | Gene            | Primer sequences (5'-3')    |
|---------|-----------------|-----------------------------|
| RT-PCR  | <i>BmJHBPd2</i> | F, ATGTGGACCGTCTGTTTTAGT    |
|         |                 | R, TTCGGGCATTAATTCGTCAA     |
| RT-PCR  | <i>BmRPL3-1</i> | F, TCGTCATCGTGGTAAGGTCAA    |
|         |                 | R, TTTGTATCCTTTGCCCTTGGT    |
| qRT-PCR | <i>BmJHBPd2</i> | F, TAGAAAAGGCTGTGTTTCGC     |
|         |                 | R, ATGAGTGATCCGCAGATT       |
| qRT-PCR | <i>BmfibH</i>   | F, TCTGTGTCATCTGCTTCATCTCG  |
|         |                 | R, TATCCAGGACGAAGTAAGAAACAA |
| qRT-PCR | <i>BmfibL</i>   | F, ATACCGATTGGTCACATAACAG   |
|         |                 | R, GCAGATAGATGGGCGATAA      |
| qRT-PCR | <i>BmP25</i>    | F, AGCCGCTGTGGCAGTTTTG      |
|         |                 | R, TAGGTGGCGTTGAAGTATGG     |
| qRT-PCR | <i>BmKr-h1</i>  | F, CTCCTCCTACTCCACCT        |
|         |                 | R, GGCAACGAAATGTAATGT       |

---

|         |                |    |                        |
|---------|----------------|----|------------------------|
| qRT-PCR | <i>BmMet1</i>  | F, | AATCTTGCCACCAACAGC     |
|         |                | R, | ACCCAACGCACATCTTCT     |
| qRT-PCR | <i>BmMet2</i>  | F, | CCGAACCAACGCAGTATGTAA  |
|         |                | R, | ACGCACGACGCCAATGA      |
| qRT-PCR | <i>BmSRC</i>   | F, | TCAAACGAGTCAAATAGGGTCA |
|         |                | R, | GCGGTCGGTGGTAGGGTT     |
| qRT-PCR | <i>Bmjhe</i>   | F, | ACAGATTGGCGGTTTTCGGA   |
|         |                | R, | CCCTTAGCGGCATCAGACAT   |
| qRT-PCR | <i>Bmjheh</i>  | F, | GGACTCTTCGGGTTAGTGATAA |
|         |                | R, | TGTGGTATTTTCGTGCATTCC  |
| qRT-PCR | <i>Bmdimm</i>  | F, | CGTGGAACCCGCATTTGTA    |
|         |                | R, | AACCTCGGCAATCCAGTCG    |
| qRT-PCR | <i>Bmsage</i>  | F, | AGCAATCACGAAGGTCCGC    |
|         |                | R, | CGTATCGTGGTTGGAGTCGT   |
| qRT-PCR | <i>Bmsgf-1</i> | F, | ATCCGACATTCGCTGTCCTT   |
|         |                | R, | TGACGTCGCAAGAAACAACC   |
| qRT-PCR | <i>BmEcR</i>   | F, | GCTGGTCTGATAACGGTGGCT  |
|         |                | R, | CAAGGATTCCGGCGACATAAC  |
| qRT-PCR | <i>BmHR3</i>   | F, | TCAACGAGAAGACACCACGG   |
|         |                | R, | AGAAACATCCTGGGGCTTGC   |
| qRT-PCR | <i>BmE75A</i>  | F, | GAAATTCGCGCTATGAGGC    |
|         |                | R, | TTTAGCGAGCACCGAATGC    |
| qRT-PCR | <i>BmE74A</i>  | F, | AGCAGTCAACTGCAAGGGTA   |
|         |                | R, | GTGCCCgATCTAAGGAGTTG   |
| qRT-PCR | <i>BmUSP</i>   | F, | AGAAGTGGACGTTCTTCGAG   |
|         |                | R, | GGTGGAACAGGTAGAGGTGC   |

---

|         |                 |    |                       |
|---------|-----------------|----|-----------------------|
| qRT-PCR | <i>BmBrc</i>    | F, | TCGCTGACAAACACGCTG    |
|         |                 | R, | ATGGTAAGAACGGCGGAC    |
| qRT-PCR | <i>BmRPL3-2</i> | F, | TTCGTACTGGCTCTTCTCGT  |
|         |                 | R, | CAAAGTTGATAGCAATTCCCT |

F indicates forward, and R indicates reverse.

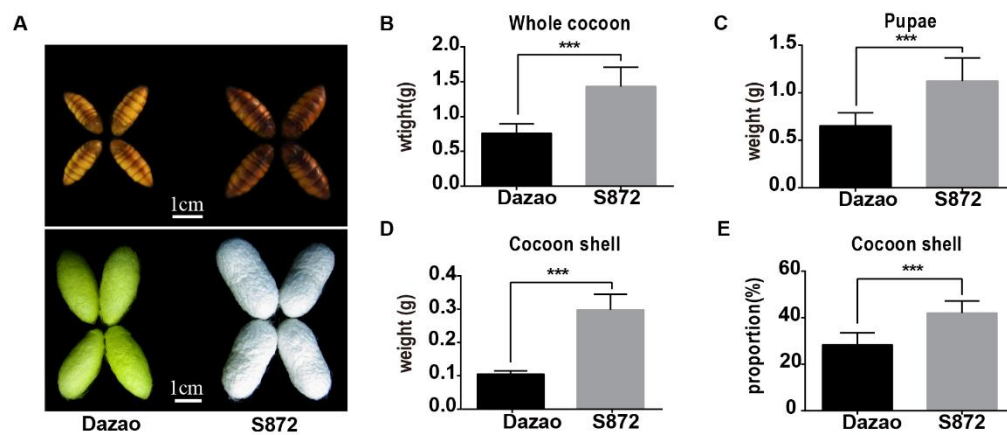

**Figure S1.** Main characteristics of different silk-producing strains of *Dazao* and *S872*. A. Pupae and cocoons. B. whole cocoon weight. C. Pupae weight. D. Cocoon shell weight. E. Cocoon shell proportion. Data are means  $\pm$  SD. \*\*\* $P < 0.001$ .

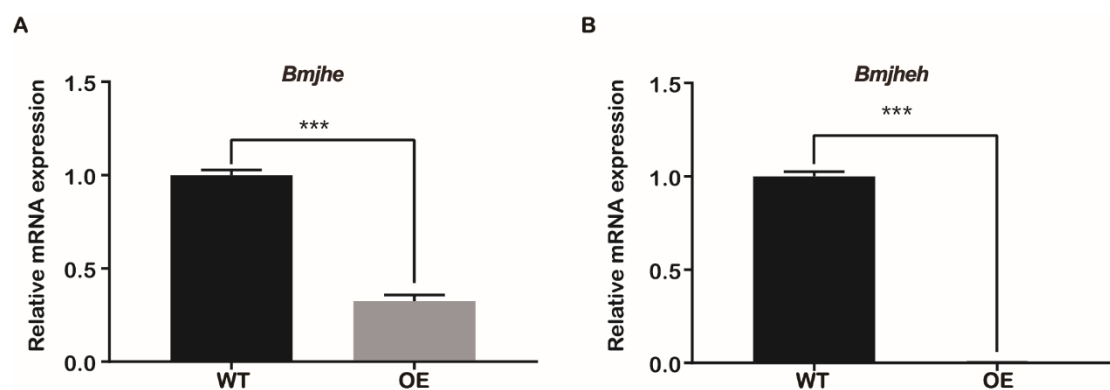

**Figure S2.** Overexpression of *BmJHBPd2* results in inhibition of JH catabolic enzyme in silk glands. The following JH catabolic enzyme related genes were selected: JHE(A) and JHEH(B). *BmRpl3* was used as a control. Results are expressed as means S.D. of three independent experiments. \*\*\* $P < 0.001$ .
